# Supplementary material
Source: publisher site journal article supplement (https://www.dovepress.com/article/611081)
Supplement: Supplementary file 1 [file 611081%20Revised%20Supplementary%20Materials.docx]

**SUPPORTING INFORMATION**





**Figure S1.** The relative fluorescence intensity of RUNX2 expression in Figure 5E. **p < 0.01.





**Figure S2.** The relative fluorescence intensity of BMP2 expression in Figure 5E. **p < 0.01.


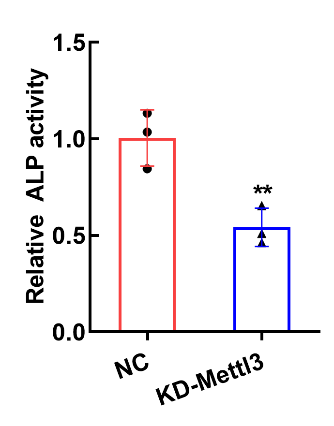


**Figure S3.** Therelative ALP activity in Figure 5F. **p < 0.01.


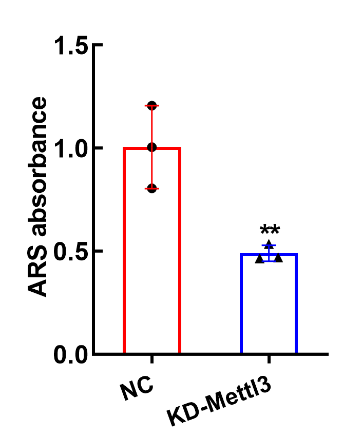


**Figure S4.** Quantitative analysis of mineralized nodules in Figure 5G. **p < 0.01.


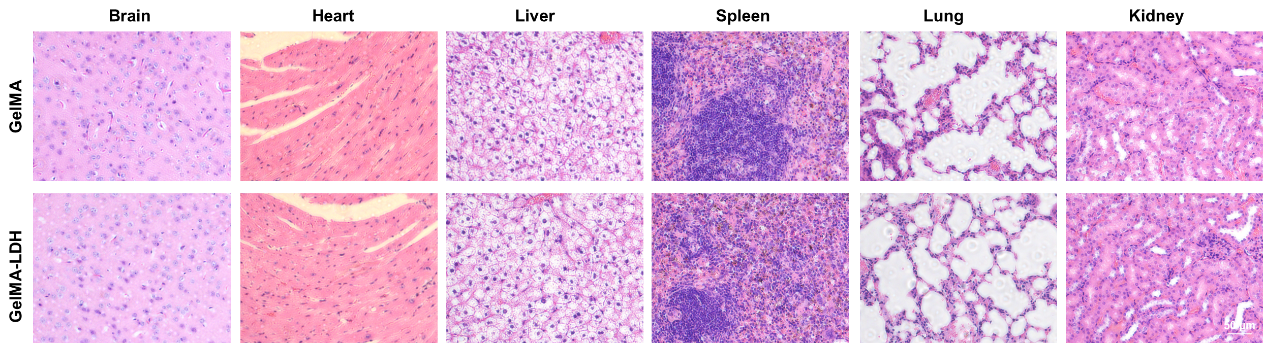


**Figure S5.** H&E staining of the tissue in all groups.


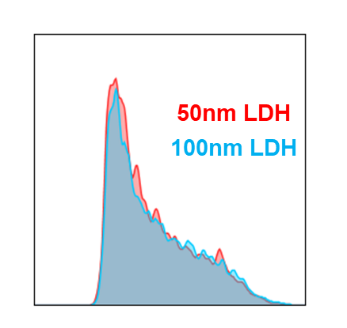


**Figure S6.** Flow cytometric quantification of FITC-labeled LDH nanoparticle uptake in BMSCs.


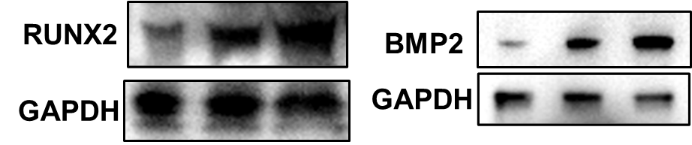


**Figure S7.** Western blot analysis of RUNX2 and BMP2 protein expression in BMSCs treated with 50 nm or 100 nm LDH nanoparticles.


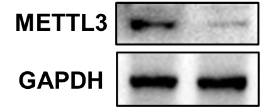


**Figure S8.** Western blot validation of METTL3 knockdown efficiency in BMSCs.


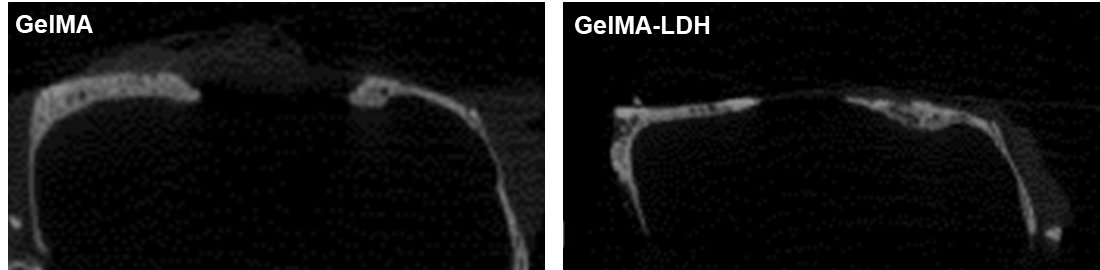


**Figure S9.** Representative cross-sectional images of calvarial defects at 12 weeks after implantation.

**Figure S10.** Quantitative analysis of trabecular number (Tb.N), trabecular thickness (Tb.Th), and trabecular separation (Tb.Sp). Data are presented as mean ± SD (n=3). **p < 0.01.

Table S1. The qPCR primer used in this work.

| Gene name | Forward primer (5’-3’) | Reverse primer (5’-3’) |
| --- | --- | --- |
| *Gapdh* | AGTGCCAGCCTCGTCTCATA | TGAACTTGCCGTGGGTAGAG |
| *Opn* | GCTTGGCTTATGGACTGAGGTC | CCTTAGACTCACCGCTCTTCATG |
| *Runx2* | CCTGAACTCTGCACCAAGTCCT | TCATCTGGCTCAGATAGGAGGG |
| *Alp* | CCAGAAAGACACCTTGACTGTGG | TCTTGTCCGTGTCGCTCACCAT |
| *Bmp2* | AACACCGTGCGCAGCTTCCATC | CGGAAGATCTGGAGTTCTGCAG |
| *Mettl3* | CAGTGCTACAGGATGACGGCTT | CCGTCCTAATGATGCGCTGCAG |
| *Mettl14* | GCAGAAACCTACGCGTCCTA | CACCACGGTCAGACTTGGA |
| *Wtap* | AGTGCCTGGAAGTTTACGCCTG | GCTTCAAGCTGTGCAATACGGC |
| *Alkbh5* | TCGGAACCTGTGCTTTCTCTGC | CTTCCTGAGAATGATGACCGCC |
| *Fto* | GCCTCGGTTTAGTTCCACTCAC | GTCGCCATCGTCTGAGTCATTG |

Table S2.Sequences of possible sites of *Runx2* mRNA with m6A modification

| Position | Sequence context | Score (combined) | Decision |
| --- | --- | --- | --- |
| 54 | CAGAA CCACA AGUGC  GGUGC AAACU UUCUC  CAGGA GGACA GCAAG | 0.626 | m6A site (High confidence) |
| 70 | GGUGC AAACU UUCUC  CAGGA GGACA GCAAG  GAGGC CCUGG UGUUU | 0.625 | m6A site (High confidence) |
| 205 | CUAUC UGGAA AAAAA  AGGAG GGACU AUGGC  GUCAA ACAGC CUCUU | 0.723 | m6A site (Very high confidence) |
| 238 | AAACA GCCUC UUCAG  UGCAG UGACA CCGUG  UCAGC AAAAC UUCUU | 0.557 | m6A site (Low confidence) |
| 255 | GCAGU GACAC CGUGU  CAGCA AAACU UCUUU  UGGGA UCCGA GCACC | 0.550 | m6A site (Low confidence) |
| 555 | ACCAU GGUGG AGAUC  AUCGC GGACC ACCCG  GCCGA ACUGG UCCGC | 0.581 | m6A site (Moderate confidence) |
| 568 | UCAUC GCGGA CCACC  CGGCC GAACU GGUCC  GCACC GACAG CCCCA | 0.649 | m6A site (High confidence) |
| 605 | CCUCG GAGAG GUACC  CGAUG GGACC GUGGU  UACCG UCAUG GCCGG | 0.610 | m6A site (High confidence) |
| 720 | GUCAU GGCCG GGAAU  GAUGA GAACU ACUCU  GCCGA GCUAC GAAAU | 0.582 | m6A site (Moderate confidence) |
| 830 | ACGAG GCAAG AGUUU  CACUU UGACC AUAAC  GGUCU UCACA AAUCC | 0.534 | m6A site (Low confidence) |
|  |  |  |  |
| 893 | UUACC ACAGA GCUAU  UAAAG UGACA GUGGA  CGGUC CCCGG GAACC | 0.575 | m6A site (Moderate confidence) |
| 925 | CCCGG GAACC AAGAA  GGCAC AGACA GAAGC  UUGAU GACUC UAAAC | 0.589 | m6A site (Moderate confidence) |
| 939 | AGGCA CAGAC AGAAG  CUUGA UGACU CUAAA  CCUAG UUUGU UCUCU | 0.566 | m6A site (Moderate confidence) |
| 1045 | CAGAA CCCAC GGCCC  UCCCU GAACU CAGCA  CCAAG UCCUU UUAAU | 0.589 | m6A site (Moderate confidence) |
| 1075 | CAAGU CCUUU UAAUC  CACAA GGACA GAGUC  AGAUU ACAGA UCCCA | 0.597 | m6A site (Moderate confidence) |
| 1330 | AGAGC CAGGC AGGUG  CUUCA GAACU GGGCC  CUUUU UCAGA CCCCA | 0.633 | m6A site (High confidence) |
| 1537 | GCUCU UCCCA AAGCC  AGAGC GGACC CUUCC  AGACC AGCAG CACUC | 0.560 | m6A site (Moderate confidence) |
| 2091 | CCACA ACAAU UCAGA  GAGGU GGACU CUGGG  UCCGG GAGGA AGAAC | 0.641 | m6A site (High confidence) |
| 4073 | AAACU UCCCU GGGCU  UAGAU GGACA UGGUU  CUCGA AGGAG CACAA | 0.583 | m6A site (Moderate confidence) |
| 4851 | GCACC CAGCC CAUAA  UAGAA AGACU UACCA  GAUUU AACUA GUUGG | 0.596 | m6A site (Moderate confidence) |
| 4909 | CUCCG AGACC CUAAG  AAAAC GAACA GAGCA  ACAUC UCCAC AUCAU | 0.557 | m6A site (Low confidence) |
| 4917 | CAACA UCUCC ACAUC  AUUAG AGACU GUCCA  CAGUA GGUUC AGAAG | 0.721 | m6A site (Very high confidence) |
|  |  |  |  |
| 5006 | CUUGC UCCAA GGAAA  GGCAC UGACU GACCU  AGUUU UAGAG AACAG | 0.606 | m6A site (High confidence) |
| 5519 | GUUUA CUCUG AACUU  CAAAG GGACU AUUUG  UAUUG UAUGU UGCAA | 0.555 | m6A site (Low confidence) |
